# Supplementary material
Source: publisher figshare collection journal article supplement (https://acs.figshare.com/ndownloader/files/9168253)
Supplement: Supplementary file 1 [file 9168253]

# **Temperature Dependent Synthesis of Tryptophan-Functionalized Gold Nanoparticles and their Application in Imaging Human Neuronal Cells**

Dae-Young Kim<sup>a</sup>, Min Kim<sup>b</sup>, Surendra Shinde<sup>a</sup>, Rijuta Ganesh Saratale<sup>c</sup>, Jung-Suk Sung<sup>b</sup>, and  
Gajanan Ghodake<sup>a\*</sup>

<sup>a</sup> Department of Biological and Environmental Science, College of Life Science and  
Biotechnology, Dongguk University-Seoul, 32, Dongguk-ro, Ilsandong-gu, Goyang-si,  
Gyeonggi-do, 10326, Republic of Korea

<sup>b</sup> Department of Life Science, College of Life Science and Biotechnology, Dongguk University-  
Seoul, 32, Dongguk-ro, Ilsandong-gu, Goyang-si, Gyeonggi-do, 10326, Republic of Korea

<sup>c</sup> Research Institute of Biotechnology & Medical Converged Science, Dongguk University-Seoul,  
32, Dongguk-ro, Ilsandong-gu, Goyang-si, Gyeonggi-do, 10326, Republic of Korea

## **Corresponding author**

Gajanan Ghodake, PhD

Tel: +82-31-961-5157,

Fax: +82-31-961-5122

E-mail: ghodakegs@gmail.com

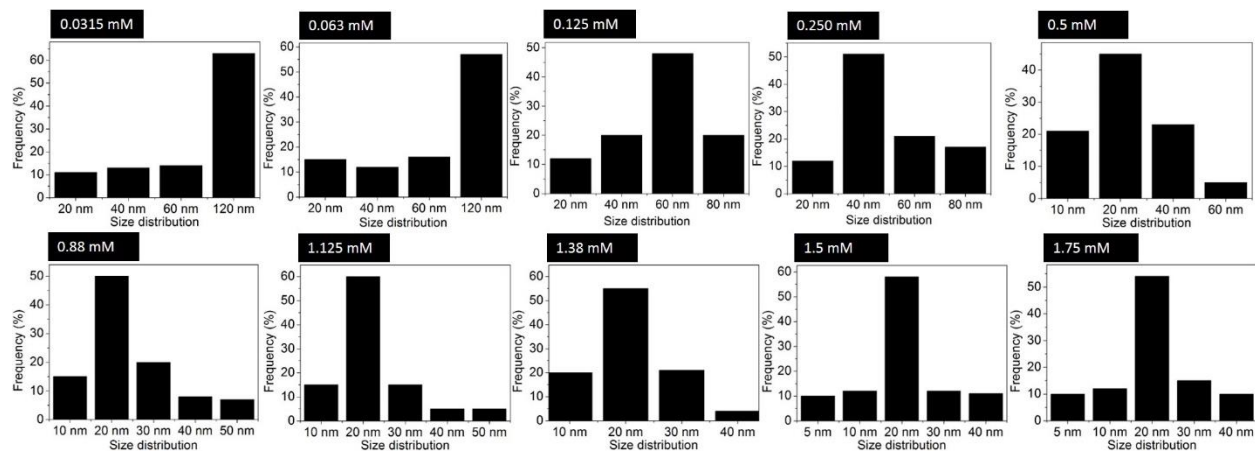

**Figure. S1** Size distribution histograms of the corresponding HR-TEM images obtained with increasing concentration of tryptophan at 95 °C.

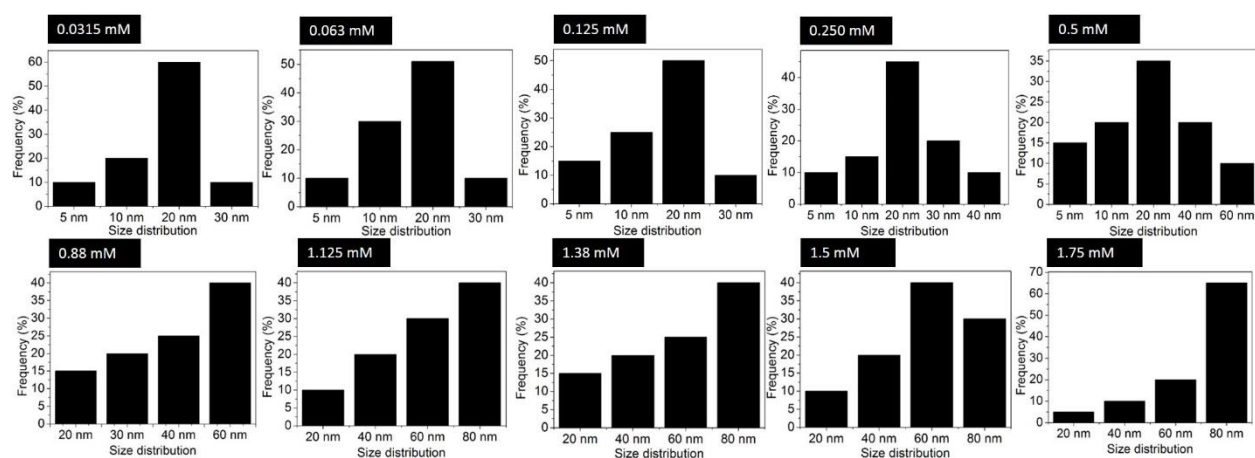

**Figure. S2** Size distribution histograms of the corresponding HR-TEM images obtained with increasing concentration of tryptophan at 35 °C.

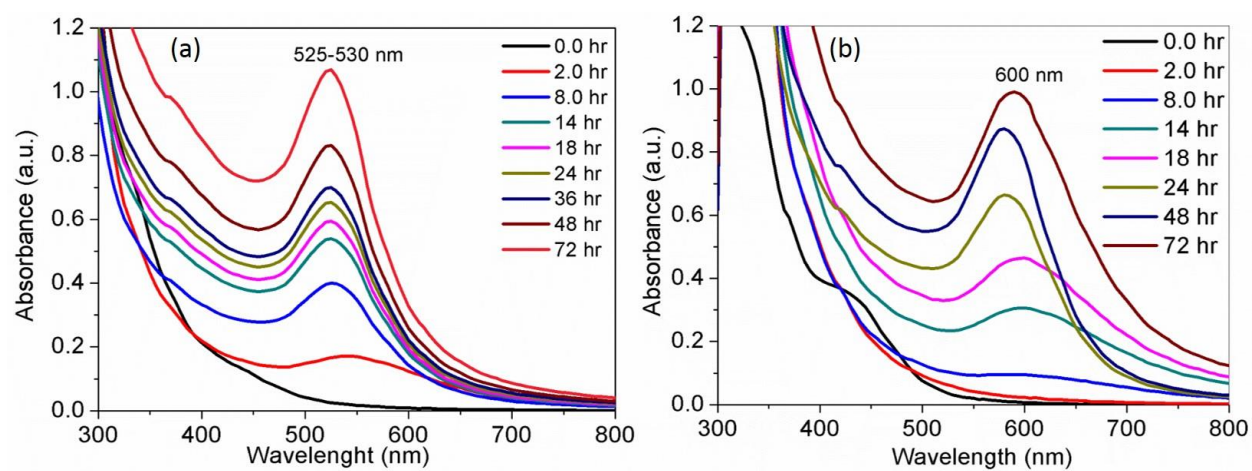

**Figure. S3** (a) Temporal evolution of UV-Vis spectrum of the gold nanoparticles with 1.75 mM tryptophan at 95 °C, (b) Temporal evolution of UV-Vis spectrum of the gold nanoparticles with 1.75 mM tryptophan at 35 °C.

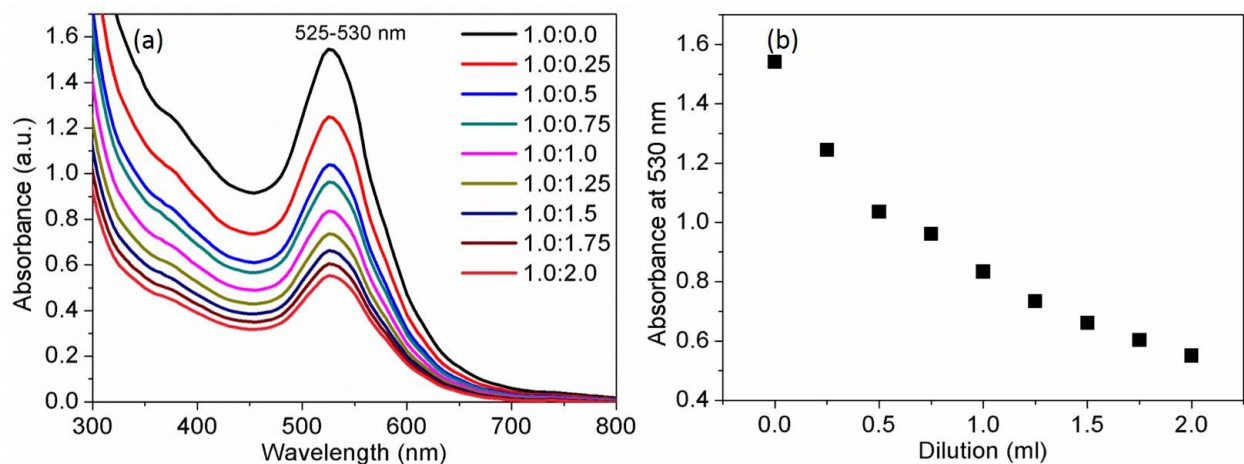

**Figure. S4** (a) Changes in UV-Vis spectrum were monitored after every successive addition of 0.25 mL of distilled water to 1 mL of AuNPs solutions, (b) Changes in absorbance were monitored after every successive addition of 0.25 mL of distilled water to 1 mL. (Gold nanoparticles were obtained by using 1.75 mM tryptophan at 95 °C).

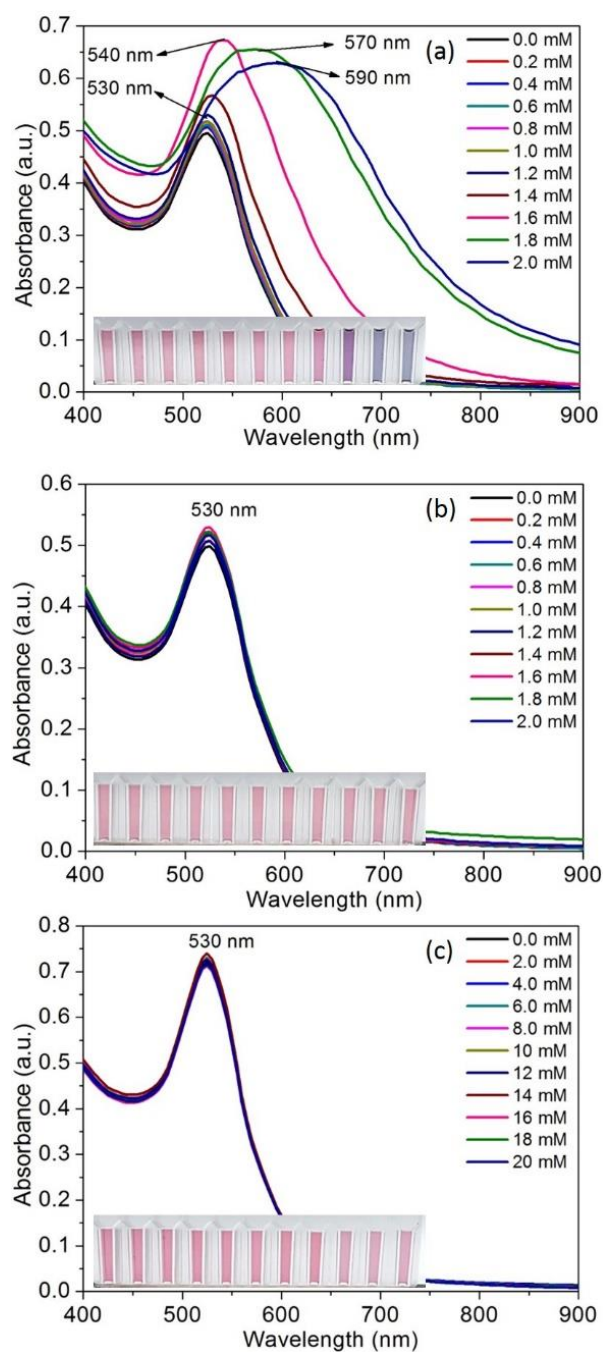

**Figure. S5** (a) Effect of diluted HCl on the UV-Vis spectrum of the gold nanoparticles, (b) Effect of diluted NaOH on the UV-Vis spectrum of the gold nanoparticles, (c) Effect of diluted NaCl on the UV-Vis spectrum of the gold nanoparticles.

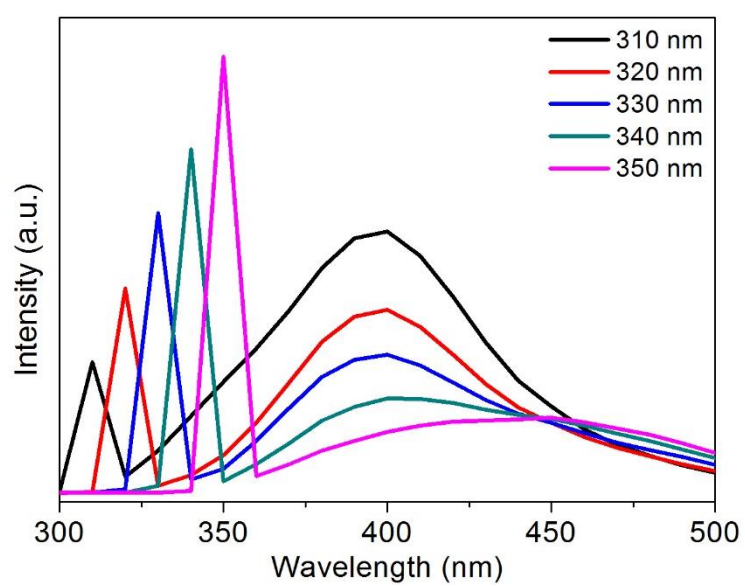

**Figure. S6** Emission spectrum of tryptophan functionalized gold nanoparticles after excitation at different wavelengths.
